# Supplementary material for: Review: the energetic value of zooplankton and nekton species of the Southern Ocean
Source: PubMed Central journal article supplement (PMC6061478; doi:10.1007/s00227-018-3386-z), 2018-07-18
Supplement: 227_2018_3386_MOESM1_ESM.pdf [file 227_2018_3386_MOESM1_ESM.pdf]

**Electronic supplement: overview tables of the energy densities of copepods, amphipods, other crustacea, chaetognaths, polychaetes and gastropods of the Southern Ocean.**

**Article title:** Review: the energetic value of zooplankton and nekton species of the Southern Ocean

**Journal:** Marine Biology

**Authors:** F.L. Schaafsma, Y. Cherel, H. Flores, J.A. van Franeker, M.A. Lea, B. Raymond, A.P. van de Putte

**Affiliation:** Wageningen Marine Research , Ankerpark 27, 1781 AG Den Helder, The Netherlands.

**E-mail address:** fokje.schaafsma@wur.nl

Table S1. Overview of the average energy density of copepod species from Donnelly et al. (1994). All values were estimated using proximate composition (PC). *n* represents the number of samples measured. Where this expresses samples of pooled individuals, this is indicated with (p). The standard deviation is given where available ( $\pm$ ).

| Season                                | Location    | <i>n</i> | Mean WW<br>(g) | Water<br>Content (%) | Mean energy density   |                       | Method | Source                |
|---------------------------------------|-------------|----------|----------------|----------------------|-----------------------|-----------------------|--------|-----------------------|
|                                       |             |          |                |                      | $\text{kJ g}^{-1}$ WW | $\text{kJ g}^{-1}$ DW |        |                       |
| <b><i>Calanoides acutus</i></b>       |             |          |                |                      |                       |                       |        |                       |
| Autumn                                | Weddell Sea | 2 (p)    | 0.20           | 86.0                 | 2.51                  | 17.57                 | PC     | Donnelly et al. 1994* |
| Winter                                | Scotia Sea  | 2 (p)    | 0.78           | 84.2 $\pm$ 0.1       | 2.51                  | 15.48                 | PC     | Donnelly et al. 1994  |
| <b><i>Calanus propinquus</i></b>      |             |          |                |                      |                       |                       |        |                       |
| Autumn                                | Weddell Sea | 2 (p)    | 0.19           | 74.0                 | 5.44                  | 21.34                 | PC     | Donnelly et al. 1994  |
| Winter                                | Scotia Sea  | 2 (p)    | 0.49           | 84.6 $\pm$ 0.5       | 2.09                  | 13.39                 | PC     | Donnelly et al. 1994  |
| <b><i>Euaugaptilis laticeps</i></b>   |             |          |                |                      |                       |                       |        |                       |
| Autumn                                | Weddell Sea | 1 (p)    | 0.04           | 83.7                 | 1.67                  | 10.04                 | PC     | Donnelly et al. 1994  |
| <b><i>Paraeuchaeta antarctica</i></b> |             |          |                |                      |                       |                       |        |                       |
| Autumn                                | Weddell Sea | 1 (p)    | 0.22           | 79.3                 | 4.60                  | 21.76                 | PC     | Donnelly et al. 1994  |
| Winter                                | Scotia Sea  | 2 (p)    | 0.33           | 84.2 $\pm$ 1.8       | 3.35                  | 20.08                 | PC     | Donnelly et al. 1994  |
| <b><i>Euchirella rostromagna</i></b>  |             |          |                |                      |                       |                       |        |                       |
| Winter                                | Scotia Sea  | 1 (p)    | 0.15           | 84.5                 | 1.26                  | 9.20                  | PC     | Donnelly et al. 1994  |
| <b><i>Gaetanus tenuispinus</i></b>    |             |          |                |                      |                       |                       |        |                       |
| Autumn                                | Weddell Sea | 1 (p)    | 0.25           | 85.0                 | 1.67                  | 12.13                 | PC     | Donnelly et al. 1994  |
| Winter                                | Scotia Sea  | 3 (p)    | 0.19           | 82.6 $\pm$ 0.9       | 2.09                  | 12.13                 | PC     | Donnelly et al. 1994  |
| <b><i>Heterorhabdus austrinus</i></b> |             |          |                |                      |                       |                       |        |                       |
| Winter                                | Scotia Sea  | 1 (p)    | 0.22           | 88.7                 | 1.26                  | 12.13                 | PC     | Donnelly et al. 1994  |
| <b><i>Heterorhabdus farrani</i></b>   |             |          |                |                      |                       |                       |        |                       |
| Winter                                | Scotia Sea  | 1 (p)    | 0.17           | 89.5                 | 1.26                  | 12.13                 | PC     | Donnelly et al. 1994  |
| <b><i>Metridia gerlachei</i></b>      |             |          |                |                      |                       |                       |        |                       |
| Autumn                                | Weddell Sea | 1 (p)    | 0.78           | 90.4                 | 1.26                  | 10.88                 | PC     | Donnelly et al. 1994  |
| Winter                                | Scotia Sea  | 1 (p)    | 0.46           | 91.0                 | 0.84                  | 9.62                  | PC     | Donnelly et al. 1994  |
| <b><i>Rhincalanus gigas</i></b>       |             |          |                |                      |                       |                       |        |                       |
| Autumn                                | Weddell Sea | 1 (p)    |                |                      |                       | 12.55                 | PC     | Donnelly et al. 1994  |
| Winter                                | Scotia Sea  | 4 (p)    | 0.82           | 91.0 $\pm$ 0.3       | 1.26                  | 13.81                 | PC     | Donnelly et al. 1994  |

\* A factor of 4.19 was used to convert calories to joules

Table S2. Overview of the average energy density of amphipod species. Values were estimated using proximate composition (PC) and one using bomb calorimetry (BC). Energetic values in italics represent values that were converted using information from the given source. *n* represents the number of samples measured. Where this expresses samples of pooled individuals, this is indicated with (p). The standard deviation is given where available ( $\pm$ ).

| Season                                         | Location    | <i>n</i> | Mean size<br>(mm) | Water<br>Content (%) | Mean energy density         |                             | Method | Source              |
|------------------------------------------------|-------------|----------|-------------------|----------------------|-----------------------------|-----------------------------|--------|---------------------|
|                                                |             |          |                   |                      | <i>kJ g<sup>-1</sup> WW</i> | <i>kJ g<sup>-1</sup> DW</i> |        |                     |
| <b><i>Cyphocaris faueri</i> (gammarid)</b>     |             |          |                   |                      |                             |                             |        |                     |
| Autumn                                         | Weddell Sea | 6        | 22.0              | 76.4 $\pm$ 5.8       | 2.42                        | <i>10.25</i>                | PC     | Torres et al. 1994* |
| <b><i>Cyphocaris richardi</i> (gammarid)</b>   |             |          |                   |                      |                             |                             |        |                     |
| Autumn                                         | Weddell Sea | 5        | 28.8              | 74.7 $\pm$ 2.5       | 2.92                        | <i>11.54</i>                | PC     | Torres et al. 1994  |
| Winter                                         | Scotia Sea  | 5        | 22.6              | 74.8 $\pm$ 2.6       | 3.84                        | <i>15.24</i>                | PC     | Torres et al. 1994  |
| <b><i>Parandania boeckii</i> (gammarid)</b>    |             |          |                   |                      |                             |                             |        |                     |
| Winter                                         | Scotia Sea  | 2 (p)    | 18.5              | 83.7 $\pm$ 2.3       | 1.62                        | <i>9.94</i>                 | PC     | Torres et al. 1994  |
| <b><i>Eusirus microps</i> (gammarid)</b>       |             |          |                   |                      |                             |                             |        |                     |
| Summer                                         | Lazarev Sea | 1 (p)    | 44.1 $\pm$ 1.7    | 80.67 $\pm$ 4.4      | 4.51                        | <i>22.25</i>                | BC     | This study (PS89)   |
| <b><i>Cylopus lucasii</i> (hyperiid)</b>       |             |          |                   |                      |                             |                             |        |                     |
| Autumn                                         | Weddell Sea | 12       | 19.8              | 68.7 $\pm$ 4.2       | 5.69                        | <i>18.18</i>                | PC     | Torres et al. 1994  |
| Winter                                         | Scotia Sea  | 8        | 21.3              | 77.6 $\pm$ 2.1       | 2.87                        | <i>12.81</i>                | PC     | Torres et al. 1994  |
| <b><i>Hyperia macrocephala</i> (hyperiid)</b>  |             |          |                   |                      |                             |                             |        |                     |
| Autumn                                         | Weddell Sea | 1        | 30.0              | 72.8                 | 3.77                        | <i>13.86</i>                | PC     | Torres et al. 1994  |
| <b><i>Hyperiella antarctica</i> (hyperiid)</b> |             |          |                   |                      |                             |                             |        |                     |
| Autumn                                         | Weddell Sea | 1 (p)    | 9.6               | 86.7                 | 1.71                        | <i>12.86</i>                | PC     | Torres et al. 1994  |
| <b><i>Primno macropa</i> (hyperiid)</b>        |             |          |                   |                      |                             |                             |        |                     |
| Autumn                                         | Weddell Sea | 2 (p)    | 14.3              | 70.6 $\pm$ 1.7       | 4.92                        | <i>16.73</i>                | PC     | Torres et al. 1994  |
| Winter                                         | Scotia Sea  | 2 (p)    | 14.7              | 76.5 $\pm$ 0.2       | 3.23                        | <i>13.74</i>                | PC     | Torres et al. 1994  |
| <b><i>Themisto gaudichaudii</i> (hyperiid)</b> |             |          |                   |                      |                             |                             |        |                     |
| Winter                                         | Scotia Sea  | 2 (p)    | 17.0              | 77.4 $\pm$ 0.5       | 2.88                        | <i>12.74</i>                | PC     | Torres et al. 1994  |
|                                                | Patagonia   | 3 (p)    | 3-12              | 86.0                 | 3.11                        | <i>22.19</i>                | BC     | Ciancio et al. 2007 |
| <b><i>Vibilia stebbingi</i> (hyperiid)</b>     |             |          |                   |                      |                             |                             |        |                     |
| Autumn                                         | Weddell Sea | 1 (p)    | 11.5              | 71.4                 | 4.11                        | <i>14.37</i>                | PC     | Torres et al. 1994  |
| Winter                                         | Scotia Sea  | 3 (p)    | 10.5              | 72.5 $\pm$ 5.2       | 3.83                        | <i>13.93</i>                | PC     | Torres et al. 1994  |

\* A factor of 4.19 was used to convert calories to joules

Table S3. Overview of the average energy density of other crustacean species. All values were estimated using proximate composition (PC). Energetic values in italics represent values that were converted using information from the given sources. The mean size of the decapods and mysids represents the carapace length, for ostracods it represents the sphere diameter. *n* represents the number of samples measured. Where this expresses samples of pooled individuals, this is indicated with (p). The standard deviation is given where available ( $\pm$ ).

| Season                                         | Location    | <i>n</i> | Mean size<br>(mm) | Water<br>content (%) | Mean energy density         |                             | Method | Source                |
|------------------------------------------------|-------------|----------|-------------------|----------------------|-----------------------------|-----------------------------|--------|-----------------------|
|                                                |             |          |                   |                      | <i>kj g<sup>-1</sup> WW</i> | <i>kj g<sup>-1</sup> DW</i> |        |                       |
| <b><i>Pasiphaea scotiae</i> (decapod)</b>      |             |          |                   |                      |                             |                             |        |                       |
| Autumn                                         | Weddell Sea | 6        | 21.7              | 63.2 $\pm$ 2.7       | 8.40                        | 22.82                       | PC     | Torres et al. 1994*   |
| Winter                                         | Scotia Sea  | 8        | 21.3              | 63.3 $\pm$ 2.1       | 6.97                        | 19.00                       | PC     | Torres et al. 1994    |
| <b><i>Petalidium foliacium</i> (decapod)</b>   |             |          |                   |                      |                             |                             |        |                       |
| Autumn                                         | Weddell Sea | 1        | 17.0              | 71.8                 | 5.58                        | 19.77                       | PC     | Torres et al. 1994    |
| Winter                                         | Scotia Sea  | 3        | 13.3              | 67.4 $\pm$ 3.3       | 8.24                        | 25.27                       | PC     | Torres et al. 1994    |
| <b><i>Boreomysis rostrata</i> (mysid)</b>      |             |          |                   |                      |                             |                             |        |                       |
| Winter                                         | Scotia Sea  | 2        | 10.0              | 75.8 $\pm$ 0.9       | 4.40                        | 18.17                       | PC     | Torres et al. 1994    |
| <b><i>Eucopeia australis</i> (mysid)</b>       |             |          |                   |                      |                             |                             |        |                       |
| Winter                                         | Scotia Sea  | 2        | 13.0              | 77.8 $\pm$ 1.8       | 5.32                        | 23.96                       | PC     | Torres et al. 1994    |
| <b><i>Gnathophausia gigas</i> (mysid)</b>      |             |          |                   |                      |                             |                             |        |                       |
| Winter                                         | Scotia Sea  | 4        | 16.8              | 69.4 $\pm$ 4.4       | 5.95                        | 19.43                       | PC     | Torres et al. 1994    |
| <b><i>Conchoecia antipoda</i> (ostracod)</b>   |             |          |                   |                      |                             |                             |        |                       |
| Winter                                         | Scotia Sea  | 1 (p)    |                   | 87.8                 | 1.67                        | 11.72                       | PC     | Donnelly et al. 1994* |
| <b><i>Conchoecia belgicae</i> (ostracod)</b>   |             |          |                   |                      |                             |                             |        |                       |
| Winter                                         | Scotia Sea  | 1 (p)    |                   | 85.9                 | 1.26                        | 7.95                        | PC     | Donnelly et al. 1994  |
| <b><i>Conchoecia hettacra</i> (ostracod)</b>   |             |          |                   |                      |                             |                             |        |                       |
| Winter                                         | Scotia Sea  | 1 (p)    |                   | 84.1                 | 1.26                        | 7.11                        | PC     | Donnelly et al. 1994  |
| <b><i>Gigantocypros mulleri</i> (ostracod)</b> |             |          |                   |                      |                             |                             |        |                       |
| Winter                                         | Scotia Sea  | 4        | 16.3              | 91.3 $\pm$ 0.4       | 0.70                        | 8.06                        | PC     | Torres et al. 1994    |

\* A factor of 4.19 was used to convert calories to joules

Table S4. Average energy density of chaetognath, polychaete and a gastropod species. Energy densities in italics represent values that were converted using information from the given sources. *n* represents the number of samples measured. Where this expresses samples of pooled individuals, this is indicated with (p). Standard deviation is given where available. All measurements were done using proximate composition (PC).

| Season                                   | Location      | <i>n</i> | Mean WW<br>(mg) | Water<br>content (%) | Mean energy density         |                             | Method | Source                |
|------------------------------------------|---------------|----------|-----------------|----------------------|-----------------------------|-----------------------------|--------|-----------------------|
|                                          |               |          |                 |                      | <i>kJ g<sup>-1</sup> WW</i> | <i>kJ g<sup>-1</sup> DW</i> |        |                       |
| <b><i>Eukrohnia hamata</i></b>           |               |          |                 |                      |                             |                             |        |                       |
| Autumn                                   | Weddell Sea   | 1 (p)    | 0.455           | 95.0                 | 0.42                        | 7.53                        | PC     | Donnelly et al. 1994* |
| Winter                                   | Scotia Sea    | 1 (p)    | 1.998           | 91.8                 | 0.84                        | 11.72                       | PC     | Donnelly et al. 1994  |
| <b><i>Sagitta gazellae</i></b>           |               |          |                 |                      |                             |                             |        |                       |
| Autumn                                   | Weddell Sea   | 1 (p)    | 4.36            | 95.1                 | 0.42                        | 5.02                        | PC     | Donnelly et al. 1994  |
| Winter                                   | Scotia Sea    | 3 (p)    | 1.36            | 93.5 ± 1.1           | 0.42                        | 7.53                        | PC     | Donnelly et al. 1994  |
| <b><i>Sagitta marri</i></b>              |               |          |                 |                      |                             |                             |        |                       |
| Winter                                   | Scotia Sea    | 1 (p)    | 0.67            | 90.8                 | 1.26                        | 11.30                       | PC     | Donnelly et al. 1994  |
| <b><i>Vanadis antarctica</i></b>         |               |          |                 |                      |                             |                             |        |                       |
| Autumn                                   | Weddell Sea   | 1        | 1.09            | 86.3                 | 2.09                        | 14.23                       | PC     | Donnelly et al. 1994  |
| <b><i>Tomopteris carpenteri</i></b>      |               |          |                 |                      |                             |                             |        |                       |
| Winter                                   | Scotia Sea    | 1 (p)    | 0.757           | 87.7                 | 1.26                        | 9.20                        | PC     | Donnelly et al. 1994  |
| Summer                                   | South Georgia | 5        |                 | 84.5                 | 1.92                        | 12.37 <sup>1</sup>          | PC     | Clarke et al. 1992    |
| <b><i>Clione limacina antarctica</i></b> |               |          |                 |                      |                             |                             |        |                       |
| Spring/summer                            | McMurdo Sound | 4 (p)    |                 |                      |                             | 24.81 <sup>2</sup>          | PC     | Bryan et al. 1995     |

<sup>1</sup>calculated using the values 39.5 kJ g<sup>-1</sup> for lipids and 23.9 kJ g<sup>-1</sup> for protein

<sup>2</sup>calculated using 39.5 kJ g<sup>-1</sup> for lipids

\* A factor of 4.19 was used to convert calories to joules
